# Supplementary material for: Structural patterns of selection and diversity for Plasmodium vivax antigens DBP and AMA1
Source: Springer Nature journal article supplement (doi:10.1186/s12936-018-2324-3), 2018-05-02
Supplement: MOESM1 [file 15733312]

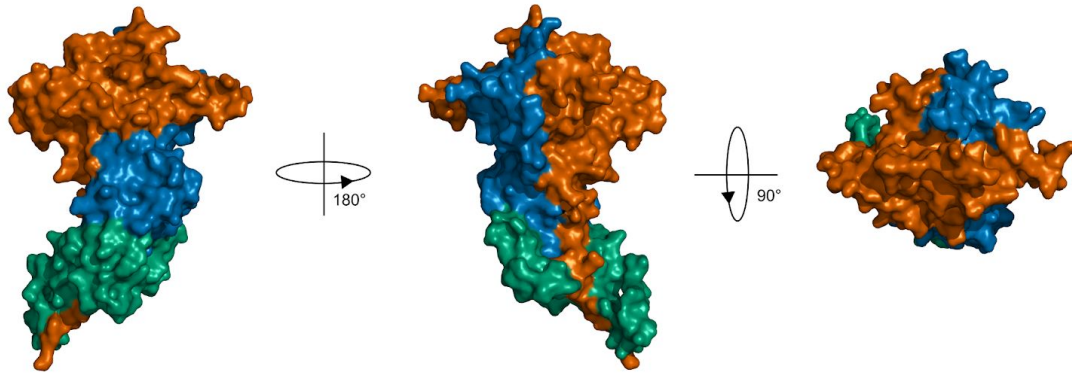

**Additional File 1: Domains/subdomains of *PvAMA1*.** *PvAMA1* has been divided into three domains, termed Domain I (DI), II (DII) and III (DIII), shown in orange, blue and green, respectively. Domain assignment follows that outlined by Pizarro *et al.* [21], and corresponds to the following residues in the Sal-1 reference sequence: 41-250 (DI); 251-387 (DII); 388-474 (DIII).
