# Supplementary material for: Structural patterns of selection and diversity for Plasmodium vivax antigens DBP and AMA1
Source: Springer Nature journal article supplement (doi:10.1186/s12936-018-2324-3), 2018-05-02
Supplement: MOESM2 [file 15733312]

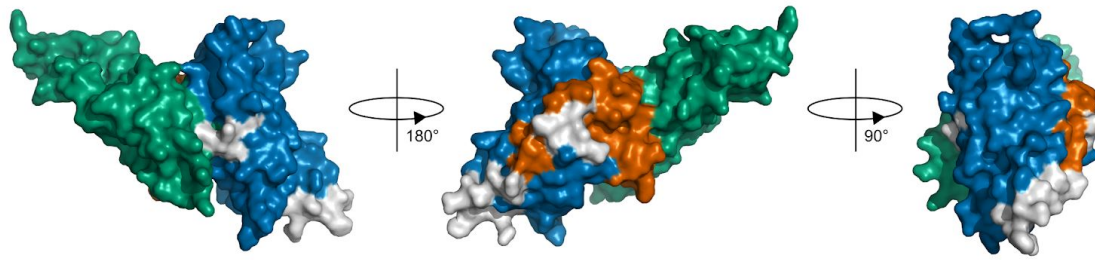

**Additional File 2: Domains/subdomains of PvDBP RII.** PvDBP RII has been divided into three subdomains, indicated in orange (subdomain 1), blue (subdomain 2) and green (subdomain 3). Subdomain assignment follows that outlined by Singh *et al.* [41], corresponding to the following residues in the Sal-1 reference sequence: 216-253 (subdomain 1); 265-381 (subdomain 2); 387-508 (subdomain 3). Linkers between subdomains are shown in white.
