# Supplementary material for: Structural patterns of selection and diversity for Plasmodium vivax antigens DBP and AMA1
Source: Springer Nature journal article supplement (doi:10.1186/s12936-018-2324-3), 2018-05-02
Supplement: MOESM6 [file 15733312]

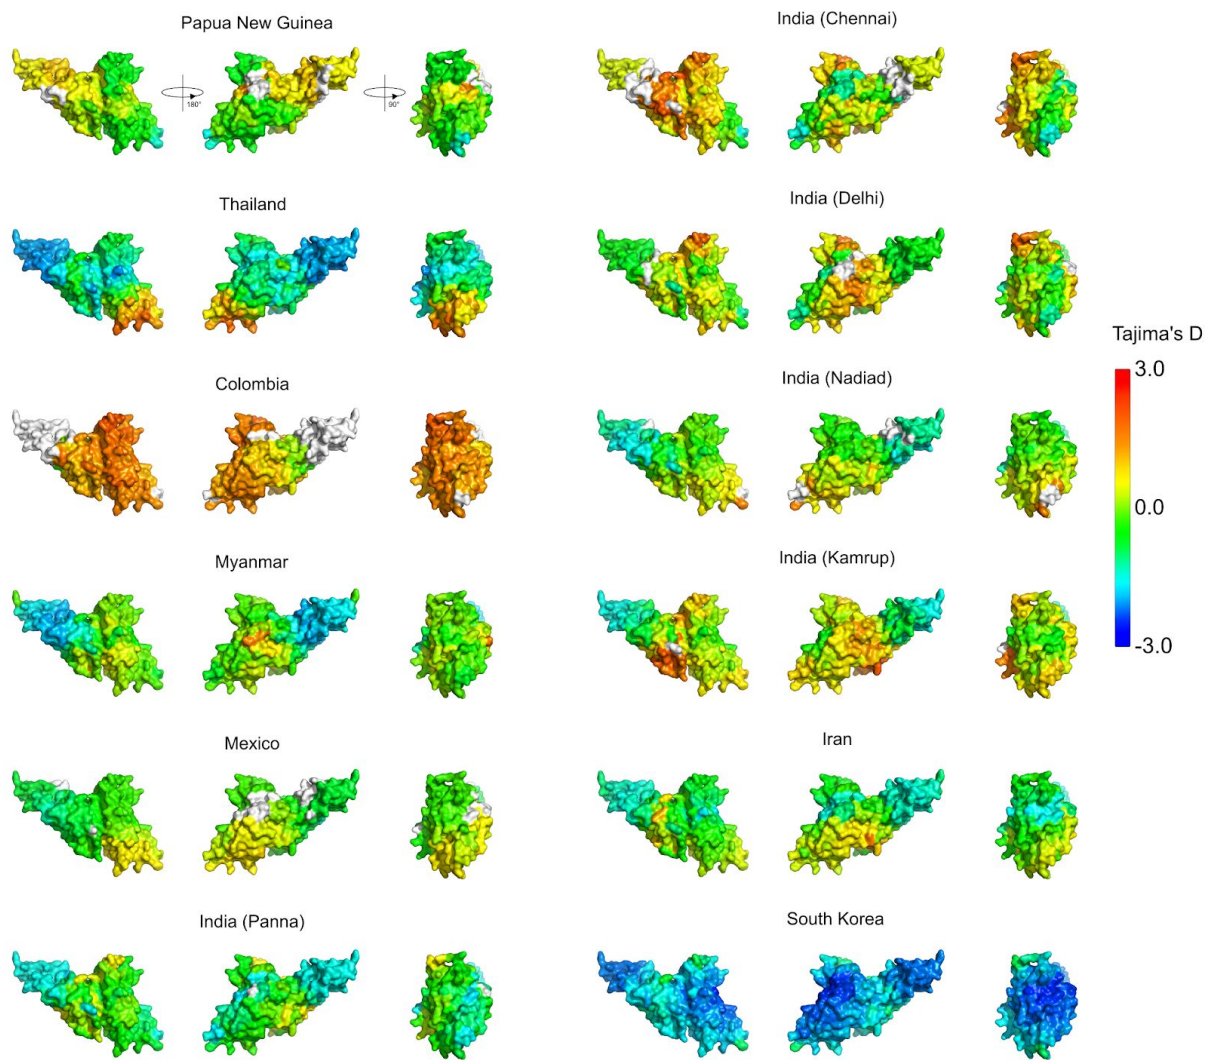

**Additional File 6: Spatially-derived Tajima's D for *PvDBP* across multiple populations.**

Tajima's D was calculated using a 3D sliding window over a modelled *PvDBP* structure, with a radius of 15 Å for each window.
