# Supplementary material for: Structural patterns of selection and diversity for Plasmodium vivax antigens DBP and AMA1
Source: Springer Nature journal article supplement (doi:10.1186/s12936-018-2324-3), 2018-05-02
Supplement: MOESM7 [file 15733312]

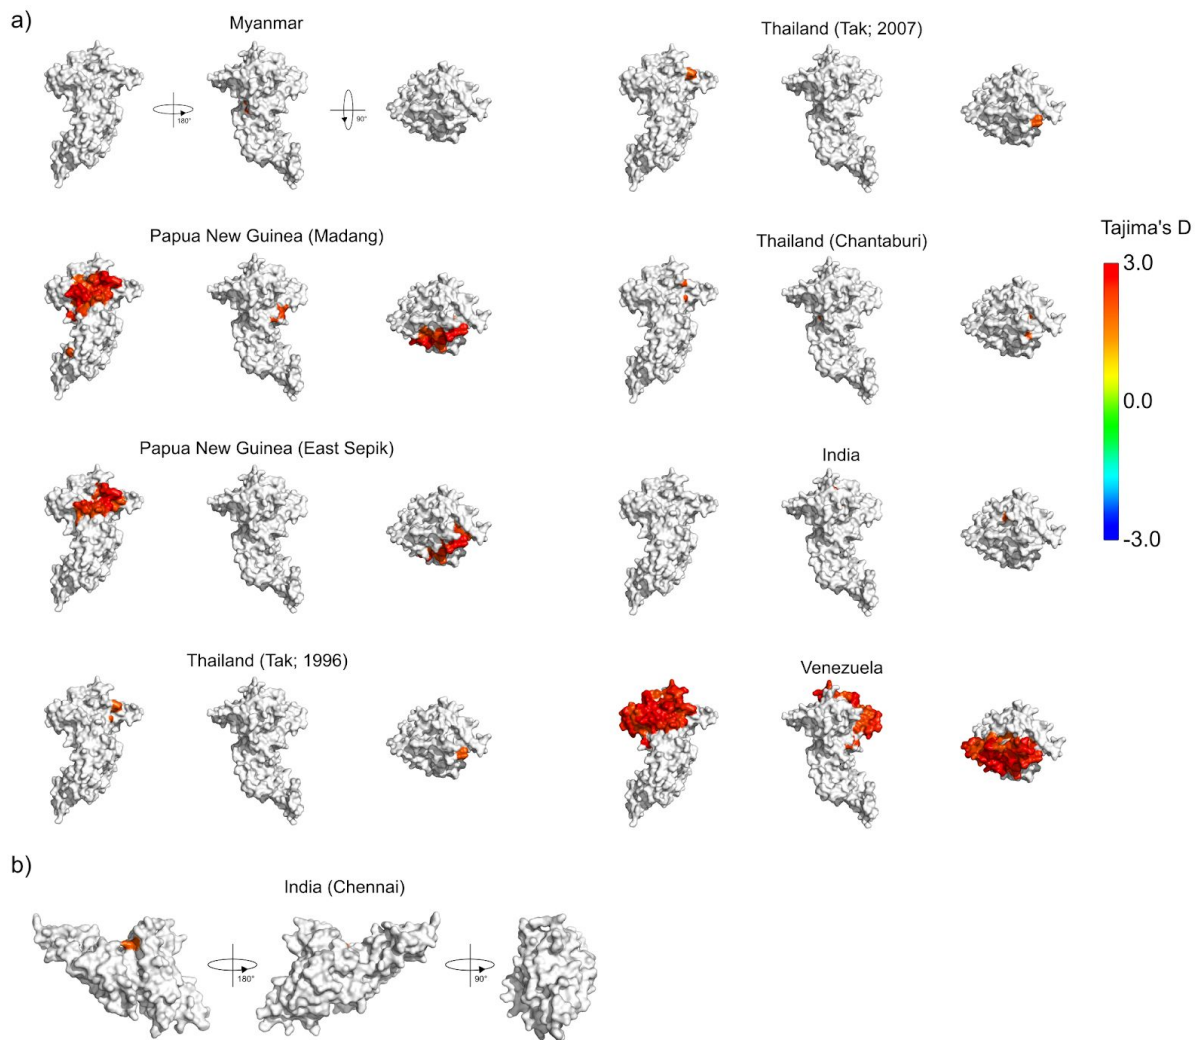

**Additional File 7: Location of statistically significant ( $p < 0.05$ ) Tajima's D values on modelled *PvAMA1* (a) and *PvDBP* (b) structures. Confidence limits are those defined by Tajima [60]. Only populations with significant Tajima's D values are shown here.**
