# Supplementary material for: Structural patterns of selection and diversity for Plasmodium vivax antigens DBP and AMA1
Source: Springer Nature journal article supplement (doi:10.1186/s12936-018-2324-3), 2018-05-02
Supplement: MOESM8 [file 15733312]

**Additional File 8: Sequence diversity at interfaces.**

| <b><i>Pv</i>DBP</b>  |                           |                                   |
|----------------------|---------------------------|-----------------------------------|
| <b>Polymorphism</b>  | <b>Minor Allele Count</b> | <b>Minor Allele Frequency (%)</b> |
| <b>R263S</b>         | <b>49</b>                 | <b>20.1</b>                       |
| T359R                | 10                        | 4.1                               |
| V240L                | 3                         | 1.2                               |
| V240I                | 1                         | 0.4                               |
| I265L                | 1                         | 0.4                               |
| K366N                | 1                         | 0.4                               |
| Y271S                | 1                         | 0.4                               |
| <b><i>Pv</i>AMA1</b> |                           |                                   |
| <b>Polymorphism</b>  | <b>Minor Allele Count</b> | <b>Minor Allele Frequency (%)</b> |
| <b>N132D</b>         | <b>235</b>                | <b>46.4</b>                       |
| <b>N130K</b>         | <b>57</b>                 | <b>11.3</b>                       |
| D133N                | 17                        | 3.4                               |
| M153T                | 12                        | 2.4                               |
| G117R                | 12                        | 2.4                               |
| K86R                 | 3                         | 0.6                               |
| A172T                | 3                         | 0.6                               |
| N132G                | 2                         | 0.4                               |
| R88G                 | 1                         | 0.2                               |

Note: The presence of polymorphisms was determined using sequences from all populations. Polymorphisms with a minor allele frequency > 5% are shown in bold. Any polymorphic residues within 4 Å of the *Pf*AMA1:RON2 interface or the *Pv*DBP dimerization/DARC binding interface are included in the above table.
