# Supplementary material for: Structural patterns of selection and diversity for Plasmodium vivax antigens DBP and AMA1
Source: Springer Nature journal article supplement (doi:10.1186/s12936-018-2324-3), 2018-05-02
Supplement: MOESM9 [file 15733312]

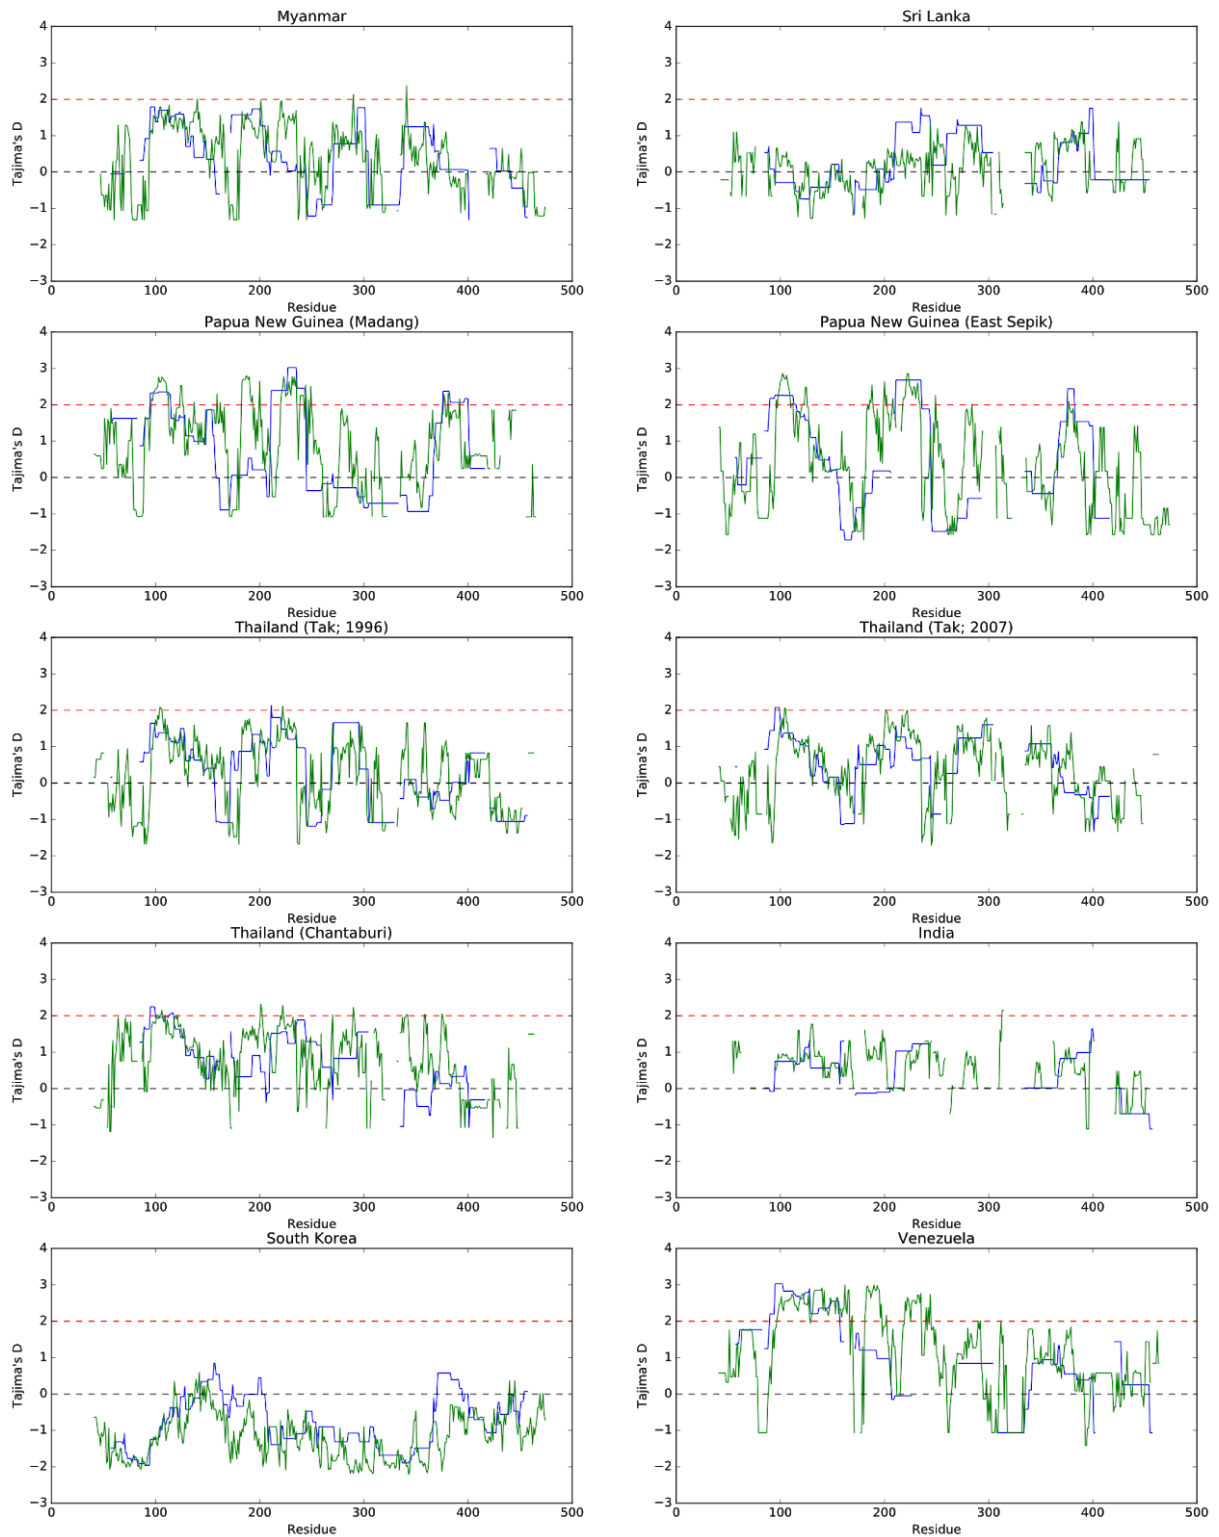

**Additional File 9: Comparison of spatially derived Tajima's D and conventional linear sliding window calculation of Tajima's D for *PvAMA1*.** Tajima's D values using a linear sliding window results are shown in blue, whilst spatially derived Tajima's D values are shown in green. The threshold for significance ( $p < 0.05$ ) as defined by Tajima [60] is shown as a dotted red line.
